# Supplementary material for: Gynecologic Symptoms among Hormone Receptor-Positive Breast Cancer Patients on Oral Endocrine Therapy: A Cross-Sectional Study
Source: MDPI journal article supplement (doi:10.3390/curroncol29030149), 2022-03-09
Supplement: s1 [file s1]

## Article

# Gynecologic Symptoms among Hormone Receptor-Positive Breast Cancer Patients on Oral Endocrine Therapy: A Cross-Sectional Study

Alexandra Moskalewicz, Amy Di Tomaso, Jacob J. Kachura, Samantha Scime, Rosane Nisenbaum, Ronita Lee, Rashida Haq, Christine Derzko and Christine Brezden-Masley

**Table S1:** Frequency of self-reported gynecologic symptoms (GS) in the past year by endocrine therapy (ET) type.

| Symptom                       | <i>n</i> <sup>1</sup> | Tamoxifen users ( <i>n</i> , %) |                    |                     |           | <i>n</i> <sup>1</sup> | AI users ( <i>n</i> , %) |                    |                     |           | <i>p</i> -value |
|-------------------------------|-----------------------|---------------------------------|--------------------|---------------------|-----------|-----------------------|--------------------------|--------------------|---------------------|-----------|-----------------|
|                               |                       | All the time                    | Often <sup>2</sup> | Rarely <sup>3</sup> | Never     |                       | All the time             | Often <sup>2</sup> | Rarely <sup>3</sup> | Never     |                 |
| Vaginal dryness               | 73                    | 14 (19.2)                       | 10 (13.7)          | 25 (34.2)           | 24 (32.9) | 69                    | 28 (40.6)                | 4 (5.8)            | 15 (21.7)           | 22 (31.9) | 0.021           |
| Vaginal discharge             | 75                    | 15 (20.0)                       | 21 (28.0)          | 16 (21.3)           | 23 (30.7) | 66                    | 2 (3.0)                  | 6 (9.1)            | 15 (22.7)           | 43 (65.2) | <.001           |
| Vaginal bleeding              | 71                    | 1 (1.4)                         | 1 (1.4)            | 14 (19.7)           | 55 (77.5) | 66                    | 1 (1.5)                  | 0 (0.0)            | 7 (10.6)            | 58 (87.9) | 0.266           |
| Vaginal itchiness             | 72                    | 2 (2.8)                         | 10 (13.9)          | 23 (31.9)           | 37 (51.4) | 65                    | 3 (4.6)                  | 6 (9.2)            | 22 (33.8)           | 34 (52.3) | 0.821           |
| Hot flashes/insomnia          | 75                    | 34 (45.3)                       | 14 (18.7)          | 22 (29.3)           | 5 (6.7)   | 66                    | 29 (43.9)                | 18 (27.3)          | 8 (12.1)            | 11 (16.7) | 0.027           |
| Decreased sex drive           | 70                    | 18 (25.7)                       | 23 (32.9)          | 16 (22.9)           | 13 (18.6) | 60                    | 31 (51.7)                | 9 (15.0)           | 9 (15.0)            | 11 (18.3) | 0.012           |
| Feel depressed                | 69                    | 8 (11.6)                        | 15 (21.7)          | 25 (36.2)           | 21 (30.4) | 63                    | 6 (9.5)                  | 20 (31.7)          | 13 (20.6)           | 24 (38.1) | 0.193           |
|                               |                       | 1 to 2                          | 3 to 4             | 5 or more           | None      |                       | 1 to 2                   | 3 to 4             | 5 or more           | None      |                 |
| Urinary tract infection (UTI) | 69                    | 5 (7.2)                         | 2 (2.9)            | 0 (0.0)             | 62 (89.9) | 66                    | 7 (10.6)                 | 2 (3.0)            | 3 (4.5)             | 54 (81.8) | 0.338           |
| Yeast infection/vaginitis     | 69                    | 8 (11.6)                        | 5 (7.2)            | 1 (1.4)             | 55 (79.7) | 61                    | 6 (9.8)                  | 0 (0.0)            | 0 (0.0)             | 55 (90.2) | 0.087           |

Abbreviations: AI (Aromatase inhibitor). <sup>1</sup> *n* represents the number of breast cancer patients who responded to each question, of the total sample size of 151 patients. <sup>2</sup> At least once a week. <sup>3</sup> A few times a year.

**Table S2.** FSFI domain and total scores by ET type.

| FSFI domain  | Tamoxifen users       |                   | AI users              |                   | <i>p</i> -value |
|--------------|-----------------------|-------------------|-----------------------|-------------------|-----------------|
|              | <i>n</i> <sup>1</sup> | Score (mean ± SD) | <i>n</i> <sup>1</sup> | Score (mean ± SD) |                 |
| Desire       | 35                    | 3.02 ± 1.03       | 20                    | 2.64 ± 1.24       | 0.188           |
| Arousal      | 34                    | 3.91 ± 1.17       | 20                    | 3.50 ± 1.26       | 0.286           |
| Lubrication  | 33                    | 4.61 ± 1.50       | 20                    | 4.13 ± 1.22       | 0.090           |
| Orgasm       | 35                    | 4.49 ± 1.11       | 20                    | 4.18 ± 1.66       | 0.661           |
| Satisfaction | 32                    | 4.68 ± 1.21       | 20                    | 4.28 ± 1.44       | 0.308           |
| Pain         | 32                    | 4.63 ± 1.52       | 20                    | 4.42 ± 1.81       | 1.000           |
| Total score  | 29                    | 24.89 ± 6.24      | 20                    | 23.14 ± 6.51      | 0.334           |

Abbreviations: FSFI (Female Sexual Function Index). <sup>1</sup> *n* indicates the number of breast cancer patients who completed the FSFI domain, of the total sample size of 55 sexually active patients who had one or more FSFI domain scored.

**Table S3.** MENQOL domain and total scores by ET type.

| MENQOL domain | Tamoxifen users       |                   | AI users              |                   | <i>p</i> -value |
|---------------|-----------------------|-------------------|-----------------------|-------------------|-----------------|
|               | <i>n</i> <sup>1</sup> | Score (mean ± SD) | <i>n</i> <sup>1</sup> | Score (mean ± SD) |                 |
| Vasomotor     | 67                    | 4.20 ± 2.32       | 62                    | 4.03 ± 2.35       | 0.692           |
| Psychosocial  | 62                    | 3.50 ± 1.74       | 60                    | 3.73 ± 1.84       | 0.525           |
| Physical      | 56                    | 3.56 ± 1.44       | 58                    | 3.90 ± 1.76       | 0.357           |
| Sexual        | 63                    | 3.57 ± 2.11       | 56                    | 4.26 ± 2.63       | 0.185           |
| Total score   | 50                    | 3.69 ± 1.48       | 48                    | 4.06 ± 1.85       | 0.338           |

Abbreviations: MENQOL (Menopause-Specific Quality of Life questionnaire). <sup>1</sup> *n* indicates the number of breast cancer patients who completed all items within a specific MENQOL domain for it to be scored, of the total sample size of 151 patients.
